# Supplementary material for: Microbial activity and water-soluble trace element species in the rhizosphere of spring wheat (Triticum aestivum cv. USU-Perigee)
Source: Royal Society of Chemistry journal article supplement (doi:10.1039/c0em00232a), 2011-01-01
Supplement: c0em00232a.pdf [file c0em00232a.pdf]

**ESI 1** Chemical and mineralogical properties of the soils prior to the  $\gamma$ -irradiation and the growth experiment.

**ESI 2** Mean concentrations of water-soluble major elements (standard deviation in parentheses) in soils A and F before and after the growth experiment for the intact (IN) and sterilized-reinoculated (SR) materials, of the bulk (Bk) and the rhizosphere (Rz) components. The Wilcoxon test indicates the significance of the differences between the Bk and the Rz soils for a given soil and treatment (ns and \* represent a  $p > 0.10$  and  $p \leq 0.10$  respectively).

**ESI 3** Mean concentrations of water-soluble Al, Cu and Zn species (standard deviation in parentheses) in soils A and F before and after the growth experiment for the intact (IN) and sterilized-reinoculated (SR) materials of the bulk (Bk) and the rhizosphere (Rz) components. The Wilcoxon test indicates the significance of the differences between the Bk and the Rz soils for a given soil and treatment (ns and \* represent a  $p > 0.10$  and  $p \leq 0.10$  respectively).

**ESI 4** Mean concentrations of water-soluble trace elements (standard deviation in parentheses) in soils A and F before and after the growth experiment for the intact (IN) and sterilized-reinoculated (SR) materials, of the bulk (Bk) and the rhizosphere (Rz) components. The Wilcoxon test indicates the significance of the differences between the Bk and the Rz soils for a given soil and treatment (ns and \* represent a  $p > 0.10$  and  $p \leq 0.10$  respectively).

**ESI 5** Mean concentration of NH<sub>4</sub>-EDTA soluble trace elements (standard deviation in parentheses) in soils A and F for the intact (IN) and sterilized-reinoculated (SR) materials, of the bulk (Bk) and the rhizosphere (Rz) components. The Wilcoxon test indicates the significance of the differences between the Bk and the Rz soils for a given soil and treatment (ns and \* represent a  $p > 0.10$  and  $p \leq 0.10$  respectively).

ESI 1

| Soil | CEC <sup>a</sup><br>cmol(+)/kg | BS <sup>b</sup><br>% | Zn <sub>ex</sub> /CEC <sup>c</sup><br>% | Pyro <sup>d</sup> |     |     |     | Oxa <sup>d</sup> |    |    |    | DC <sup>d</sup>                            | Mineralogy of the clay fraction ≤ 2 μm <sup>e</sup> |     |           |        |      |      |
|------|--------------------------------|----------------------|-----------------------------------------|-------------------|-----|-----|-----|------------------|----|----|----|--------------------------------------------|-----------------------------------------------------|-----|-----------|--------|------|------|
|      |                                |                      |                                         | Fe                | Al  | Fe  | Al  | Fe               | Al | Fe | Al |                                            | Qtz                                                 | Chl | Chl-Vermi | K-Feld | Plag | Mica |
|      |                                |                      |                                         | -----g/kg-----    |     |     |     |                  |    |    |    | -----relative abundance <sup>f</sup> ----- |                                                     |     |           |        |      |      |
| A    | 4.3                            | 53                   | 23                                      | 2.6               | 2.4 | 6.9 | 4.6 | 9.8              | 4  | 3  | 3  | 2                                          | 2                                                   | 1   | 1         | 1      | 1    | ---  |
| F    | 17.9                           | 92                   | 7                                       | 4.6               | 2.1 | 4.6 | 2.2 | 16.7             | 4  | 3  | 3  | 2                                          | 2                                                   | 1   | 1         | 1      | 1    | 1    |

<sup>a</sup> CEC = cation-exchange capacity as the sum of BaCl<sub>2</sub>-exchangeable cations

<sup>b</sup> BS = base saturation

<sup>c</sup> Zn<sub>ex</sub>/CEC = exchangeable zinc saturation computed as exchangeable Zn (Zn<sub>ex</sub>) divided by CEC

<sup>d</sup> Pyro = sodium pyrophosphate; Oxa = acid ammonium oxalate; DC = dithionite-citrate extractions

<sup>e</sup> Qtz = quartz; Chl = chlorite; Chl-Vermi = chlorite-vermiculite interstratified; K-Feld = K-feldspath; Plag = plagioclase;

Amphi = amphibole; Vermi = vermiculite;

<sup>f</sup> 4 = dominant; 3 = major; 2 = minor and 1 = trace

ESI 2

| Soil Treatment <sup>a</sup>       | Component | n <sup>b</sup> | EC <sup>c</sup><br>μS/cm | H <sup>+</sup><br>μM | Ca              | Mg             | Na            | NH <sub>4</sub> | K               | Cl            | NO <sub>3</sub>   | SO <sub>4</sub> | Tot N <sup>c</sup> | DON <sup>c</sup> | DOC <sup>c</sup> |
|-----------------------------------|-----------|----------------|--------------------------|----------------------|-----------------|----------------|---------------|-----------------|-----------------|---------------|-------------------|-----------------|--------------------|------------------|------------------|
| <b>A Before growth experiment</b> |           |                |                          |                      |                 |                |               |                 |                 |               |                   |                 |                    |                  |                  |
| <b>Initial</b>                    |           |                |                          |                      |                 |                |               |                 |                 |               |                   |                 |                    |                  |                  |
|                                   |           | 1              | 77<br>(4)                | 6.2<br>(0.4)         | 998<br>(105)    | 148<br>(5)     | 252<br>(10)   | 2677<br>(297)   | 807<br>(20)     | 274<br>(6)    | 220<br>(10)       | 446<br>(24)     | 120<br>(1)         | 79<br>(4)        | 532<br>(28)      |
| <b>Sterilized</b>                 |           |                |                          |                      |                 |                |               |                 |                 |               |                   |                 |                    |                  |                  |
|                                   |           | 1              | 85<br>(8)                | 15.6<br>(1.2)        | 2160<br>(72)    | 274<br>(29)    | 195<br>(7)    | 485<br>(42)     | 943<br>(73)     | 157<br>(4)    | 402<br>(51)       | 298<br>(22)     | 50<br>(1)          | 38<br>(1)        | 547<br>(69)      |
| <b>After growth experiment</b>    |           |                |                          |                      |                 |                |               |                 |                 |               |                   |                 |                    |                  |                  |
| <b>IN Bk</b>                      |           |                |                          |                      |                 |                |               |                 |                 |               |                   |                 |                    |                  |                  |
|                                   |           | 4              | 90ns<br>(10)             | 12ns<br>(2)          | 2071ns<br>(200) | 248ns<br>(34)  | 185ns<br>(24) | 163ns<br>(24)   | 848ns<br>(41)   | 102ns<br>(23) | 7367ns<br>(1287)  | 248ns<br>(12)   | 8234ns<br>(1880)   | 259ns<br>(3)     | 9093ns<br>(1166) |
| <b>Rz</b>                         |           |                |                          |                      |                 |                |               |                 |                 |               |                   |                 |                    |                  |                  |
|                                   |           | 3              | 107<br>(2)               | 13<br>(1)            | 2203<br>(174)   | 315<br>(7)     | 368<br>(6)    | 259<br>(11)     | 1360<br>(26)    | 142<br>(3)    | 8354<br>(41)      | 137<br>(15)     | 9265<br>(76)       | 652<br>(50)      | 7835<br>(178)    |
| <b>SR Bk</b>                      |           |                |                          |                      |                 |                |               |                 |                 |               |                   |                 |                    |                  |                  |
|                                   |           | 4              | 132ns<br>(12)            | 15ns<br>(1)          | 2839ns<br>(156) | 354ns<br>(24)  | 235ns<br>(26) | 287ns<br>(41)   | 1266ns<br>(145) | 100ns<br>(11) | 10407ns<br>(790)  | 222ns<br>(13)   | 11439ns<br>(945)   | 745ns<br>(465)   | 7892ns<br>(334)  |
| <b>Rz</b>                         |           |                |                          |                      |                 |                |               |                 |                 |               |                   |                 |                    |                  |                  |
|                                   |           | 3              | 147<br>(1)               | 18<br>(0.2)          | 3318<br>(318)   | 408<br>(15)    | 326<br>(5)    | 305<br>(4)      | 1188<br>(8)     | 207<br>(4)    | 12043<br>(90)     | 139<br>(5)      | 12545<br>(110)     | 197<br>(89)      | 9190<br>(1472)   |
| <b>F Before growth experiment</b> |           |                |                          |                      |                 |                |               |                 |                 |               |                   |                 |                    |                  |                  |
| <b>Initial</b>                    |           |                |                          |                      |                 |                |               |                 |                 |               |                   |                 |                    |                  |                  |
|                                   |           | 1              | 102<br>(1)               | 1.1<br>(0.1)         | 2809<br>(108)   | 821<br>(13)    | 368<br>(5)    | 2245<br>(28)    | 987<br>(3)      | 216<br>(8)    | 603<br>(21)       | 273<br>(7)      | 157<br>(7)         | 117<br>(6)       | 924<br>(52)      |
| <b>Sterilized</b>                 |           |                |                          |                      |                 |                |               |                 |                 |               |                   |                 |                    |                  |                  |
|                                   |           | 1              | 117<br>(3)               | 2.1<br>(0.2)         | 1679<br>(179)   | 1729<br>(88)   | 271<br>(10)   | 50<br>(41)      | 1144<br>(16)    | 154<br>(19)   | 622<br>(84)       | 204<br>(6)      | 114<br>(8)         | 104<br>(7)       | 957<br>(86)      |
| <b>After growth experiment</b>    |           |                |                          |                      |                 |                |               |                 |                 |               |                   |                 |                    |                  |                  |
| <b>IN Bk</b>                      |           |                |                          |                      |                 |                |               |                 |                 |               |                   |                 |                    |                  |                  |
|                                   |           | 4              | 98*<br>(12)              | 1.8*<br>(0.1)        | 818*<br>(73)    | 1197*<br>(181) | 78*<br>(14)   | 101ns<br>(54)   | 860*<br>(29)    | 64*<br>(38)   | 6130*<br>(934)    | 627*<br>(66)    | 10285ns<br>(1204)  | 4056*<br>(1602)  | 24429*<br>(286)  |
| <b>Rz</b>                         |           |                |                          |                      |                 |                |               |                 |                 |               |                   |                 |                    |                  |                  |
|                                   |           | 4              | 168<br>(19)              | 1.0<br>(0.2)         | 1226<br>(103)   | 2422<br>(267)  | 772<br>(108)  | 71<br>(23)      | 272<br>(77)     | 138<br>(65)   | 10090<br>(1660)   | 1886<br>(244)   | 12209<br>(2317)    | 2049<br>(643)    | 27480<br>(1490)  |
| <b>SR Bk</b>                      |           |                |                          |                      |                 |                |               |                 |                 |               |                   |                 |                    |                  |                  |
|                                   |           | 4              | 147*<br>(12)             | 2.1*<br>(0.2)        | 1214ns<br>(80)  | 1876*<br>(199) | 111*<br>(20)  | 130*<br>(24)    | 859*<br>(50)    | 81ns<br>(9)   | 11004ns<br>(1130) | 595*<br>(78)    | 12267ns<br>(1245)  | 1493ns<br>(510)  | 24462*<br>(515)  |
| <b>Rz</b>                         |           |                |                          |                      |                 |                |               |                 |                 |               |                   |                 |                    |                  |                  |
|                                   |           | 4              | 172<br>(9)               | 1.5<br>(0.1)         | 1270<br>(50)    | 2486<br>(164)  | 648<br>(101)  | 146<br>(20)     | 72<br>(27)      | 51<br>(33)    | 10064<br>(938)    | 2582<br>(596)   | 11457<br>(1216)    | 1248<br>(355)    | 34282<br>(2188)  |
| <b>dlim<sup>d</sup></b>           |           |                |                          |                      |                 |                |               |                 |                 |               |                   |                 |                    |                  |                  |
|                                   |           |                | 1.0                      | 0.01                 | 10              | 5              | 10            | 10              | 10              | 10            | 10                | 10              | 15                 | 25               | 20               |

<sup>a</sup> Initial = initial soil; Sterilized = 100% sterilized soil; IN = intact non sterilized soil; SR = sterilized-reinoculated soil

<sup>b</sup> For n = 1, the standard deviations are estimated from analytical replication

<sup>c</sup> EC = electrical conductivity; Tot N = total soluble nitrogen; DON = dissolved organic nitrogen; DOC = dissolved organic carbon

<sup>d</sup> dlim = detection limit of the method

ESI 3

| Soil                   | Treatment <sup>a</sup>          | Component  | n <sup>b</sup> | Al         | Al <sub>tm</sub> <sup>c</sup> | Al <sub>om</sub> <sup>c</sup> | Al <sub>im</sub> <sup>c</sup> | Cu          | Cu <sup>2+</sup> | Zn          | ZnL <sup>c</sup> |            |
|------------------------|---------------------------------|------------|----------------|------------|-------------------------------|-------------------------------|-------------------------------|-------------|------------------|-------------|------------------|------------|
| -----µmol/kg soil----- |                                 |            |                |            |                               |                               |                               |             |                  |             |                  |            |
| A                      | <i>Before growth experiment</i> |            |                |            |                               |                               |                               |             |                  |             |                  |            |
|                        |                                 | Initial    | 1              | 186 (6.2)  | ---                           | ---                           | ---                           | 1.25 (0.03) | ---              | 38.6 (0.8)  | ---              |            |
|                        |                                 | Sterilized | 1              | 268 (36.2) | ---                           | ---                           | ---                           | 0.94 (0.16) | ---              | 75.9 (10.1) | ---              |            |
|                        | <i>After growth experiment</i>  |            |                |            |                               |                               |                               |             |                  |             |                  |            |
|                        |                                 | IN         | 4              | 152 (3.2)  | 92.8 (6.0)                    | 35.3 (0.2)                    | 57.5 (6.3)                    | 0.65 (0.03) | 0.45 (0.03)      | 106 (10.3)  | ns               | 92 (8.2)   |
|                        |                                 | Bk         | 4              | 152 (3.2)  | 92.8 (6.0)                    | 35.3 (0.2)                    | 57.5 (6.3)                    | 0.65 (0.03) | 0.45 (0.03)      | 106 (10.3)  | ns               | 92 (8.2)   |
|                        |                                 | Rz         | 3              | 119 (8.3)  | 109.5 (0.9)                   | 35.6 (0.1)                    | 73.6 (2.5)                    | 0.47 (0.01) | 0.31 (0.03)      | 127 (3.3)   | ns               | 99 (3.2)   |
|                        |                                 | SR         | 4              | 170 (11.0) | 126.7 (11.3)                  | 35.2 (1.3)                    | 91.5 (11.9)                   | 0.51 (0.02) | 0.36 (0.03)      | 160 (16.1)  | ns               | 130 (11.6) |
|                        |                                 | Bk         | 4              | 170 (11.0) | 126.7 (11.3)                  | 35.2 (1.3)                    | 91.5 (11.9)                   | 0.51 (0.02) | 0.36 (0.03)      | 160 (16.1)  | ns               | 130 (11.6) |
|                        |                                 | Rz         | 3              | 152 (1.9)  | 149.9 (1.4)                   | 35.6 (1.8)                    | 114.3 (3.0)                   | 0.48 (0.01) | 0.44 (0.02)      | 189 (3.2)   | ns               | 139 (4.4)  |
| F                      | <i>Before growth experiment</i> |            |                |            |                               |                               |                               |             |                  |             |                  |            |
|                        |                                 | Initial    | 1              | 154 (3.8)  | ---                           | ---                           | ---                           | 2.09 (0.01) | ---              | 169 (3.8)   | ---              |            |
|                        |                                 | Sterilized | 1              | 189 (6.5)  | ---                           | ---                           | ---                           | 1.85 (0.03) | ---              | 313 (28.6)  | ---              |            |
|                        | <i>After growth experiment</i>  |            |                |            |                               |                               |                               |             |                  |             |                  |            |
|                        |                                 | IN         | 4              | 118 (9.7)  | 38.5 (0.8)                    | 30.2 (2.0)                    | 8.4 (1.4)                     | 1.22 (0.04) | 0.11 (0.02)      | 202 (14.9)  | ns               | 137 (17.1) |
|                        |                                 | Bk         | 4              | 118 (9.7)  | 38.5 (0.8)                    | 30.2 (2.0)                    | 8.4 (1.4)                     | 1.22 (0.04) | 0.11 (0.02)      | 202 (14.9)  | ns               | 137 (17.1) |
|                        |                                 | Rz         | 4              | 70 (8.1)   | 32.2 (4.6)                    | 24.3 (2.5)                    | 7.9 (2.4)                     | 1.31 (0.06) | 0.07 (0.01)      | 190 (38.8)  | ns               | 122 (32.2) |
|                        |                                 | SR         | 4              | 100 (6.7)  | 36.9 (0.9)                    | 29.0 (2.3)                    | 7.9 (1.7)                     | 1.13 (0.02) | 0.07 (0.02)      | 223 (11.5)  | *                | 161 (5.4)  |
|                        |                                 | Bk         | 4              | 100 (6.7)  | 36.9 (0.9)                    | 29.0 (2.3)                    | 7.9 (1.7)                     | 1.13 (0.02) | 0.07 (0.02)      | 223 (11.5)  | *                | 161 (5.4)  |
|                        |                                 | Rz         | 4              | 92 (1.9)   | 47.8 (6.1)                    | 35.7 (3.1)                    | 12.2 (3.1)                    | 1.42 (0.02) | 0.08 (0.01)      | 256 (11.0)  | ns               | 176 (12.0) |
|                        | dlim <sup>d</sup>               |            | 0.12           | 0.01       | 0.01                          | 0.01                          | 0.02                          | 0.03        | 0.03             | 0.03        | 0.02             |            |

<sup>a</sup> Initial = initial soil; Sterilized = 100% sterilized soil; IN = intact non sterilized soil; SR = sterilized-reinoculated soil

<sup>b</sup> For n = 1, the standard deviations are estimated from analytical replication

<sup>c</sup> Al<sub>tm</sub>, Al<sub>om</sub>, Al<sub>im</sub>: total monomeric, organic and inorganic monomeric aluminum; ZnL : labile Zn

<sup>d</sup> dlim = detection limit of the method

ESI 4

| Soil                              | Treatment <sup>a</sup> | Component | n <sup>b</sup> | As               | Cd             | Ce               | Cr             | Fe            | Pb               | Tl                 |
|-----------------------------------|------------------------|-----------|----------------|------------------|----------------|------------------|----------------|---------------|------------------|--------------------|
| -----µmol/kg soil-----            |                        |           |                |                  |                |                  |                |               |                  |                    |
| <b>A Before growth experiment</b> |                        |           |                |                  |                |                  |                |               |                  |                    |
|                                   | Initial                |           | 1              | 0.135<br>(0.001) | 0.12<br>(0.01) | 0.114<br>(0.004) | 0.23<br>(0.01) | 24.8<br>(4.3) | 0.038<br>(0.022) | 0.002<br>(0.002)   |
|                                   | Sterilized             |           | 1              | 0.100<br>(0.009) | 0.28<br>(0.04) | 0.107<br>(0.019) | 0.25<br>(0.04) | 21.9<br>(2.7) | 0.078<br>(0.012) | 0.003<br>(0.002)   |
| <b>After growth experiment</b>    |                        |           |                |                  |                |                  |                |               |                  |                    |
|                                   | IN                     | Bk        | 4              | 0.095<br>(0.004) | 0.27<br>(0.04) | 0.072<br>(0.002) | 0.16<br>(0.02) | 18.7<br>(1.8) | 0.028<br>(0.004) | 0.0026<br>(0.0007) |
|                                   |                        | Rz        | 3              | 0.076<br>(0.003) | 0.30<br>(0.01) | 0.058<br>(0.003) | 0.14<br>(0.01) | 16.3<br>(0.2) | 0.033<br>(0.001) | 0.0032<br>(0.0002) |
|                                   | SR                     | Bk        | 4              | 0.092<br>(0.006) | 0.43<br>(0.04) | 0.069<br>(0.003) | 0.13<br>(0.01) | 16.7<br>(1.1) | 0.028<br>(0.002) | 0.0033<br>(0.0002) |
|                                   |                        | Rz        | 3              | 0.073<br>(0.004) | 0.47<br>(0.01) | 0.059<br>(0.001) | 0.11<br>(0.01) | 12.0<br>(1.6) | 0.030<br>(0.001) | 0.0038<br>(0.001)  |
| <b>F Before growth experiment</b> |                        |           |                |                  |                |                  |                |               |                  |                    |
|                                   | Initial                |           | 1              | 0.457<br>(0.005) | 0.41<br>(0.05) | 0.092<br>(0.007) | 0.23<br>(0.01) | 56.1<br>(3.2) | 0.035<br>(0.002) | 0.004<br>(0.001)   |
|                                   | Sterilized             |           | 1              | 0.384<br>(0.032) | 0.55<br>(0.06) | 0.085<br>(0.005) | 0.23<br>(0.03) | 48.3<br>(0.4) | 0.042<br>(0.001) | 0.004<br>(0.001)   |
| <b>After growth experiment</b>    |                        |           |                |                  |                |                  |                |               |                  |                    |
|                                   | IN                     | Bk        | 4              | 0.327<br>(0.001) | 0.33<br>(0.03) | 0.062<br>(0.005) | 0.11<br>(0.01) | 26.4<br>(2.9) | 0.027<br>(0.006) | 0.0025<br>(0.0001) |
|                                   |                        | Rz        | 4              | 0.231<br>(0.016) | 0.35<br>(0.05) | 0.052<br>(0.003) | 0.09<br>(0.01) | 19.9<br>(1.4) | 0.017<br>(0.003) | 0.0022<br>(0.0002) |
|                                   | SR                     | Bk        | 4              | 0.320<br>(0.011) | 0.43<br>(0.04) | 0.058<br>(0.004) | 0.11<br>(0.01) | 20.3<br>(3.1) | 0.025<br>(0.003) | 0.0027<br>(0.0003) |
|                                   |                        | Rz        | 4              | 0.245<br>(0.011) | 0.47<br>(0.03) | 0.065<br>(0.005) | 0.11<br>(0.01) | 22.6<br>(1.1) | 0.024<br>(0.003) | 0.0025<br>(0.0006) |
|                                   | dlim <sup>c</sup>      |           |                | 0.032            | 0.005          | 0.004            | 0.020          | 0.306         | 0.007            | 0.001              |

<sup>a</sup> Initial = initial soil; Sterilized = 100% sterilized soil; IN = intact non sterilized soil; SR = sterilized-reinoculated soil

<sup>b</sup> For n = 1, the standard deviations are estimated from analytical replication

<sup>c</sup> dlim = detection limit of the method

ESI 5

| Soil              | Treatment <sup>a</sup> | Component              | n | Al             | As                | Cd             | Ce            | Cr             | Cu               | Pb               | Zn          |
|-------------------|------------------------|------------------------|---|----------------|-------------------|----------------|---------------|----------------|------------------|------------------|-------------|
| -----µmol/kg----- |                        |                        |   |                |                   |                |               |                |                  |                  |             |
| A                 | IN                     | Bk                     | 4 | 18310<br>(152) | <dlm              | 4.49<br>(0.12) | 14.1<br>(0.4) | 1.10<br>(0.21) | 29.3<br>(0.31)   | 25.4<br>(0.7)    | 892<br>ns   |
|                   |                        | Rz                     | 3 | 18580<br>(56)  | <dlm              | 4.56<br>(0.04) | 14.2<br>(0.1) | 1.25<br>(0.02) | 31.9<br>(0.79)   | 58.8<br>(0.5)    | 873         |
| F                 | IN                     | Bk                     | 4 | 10192<br>(289) | 1.73<br>(0.13) *  | 52.9<br>(1.4)  | 27.3<br>(1.4) | 3.08<br>(0.19) | 114.1<br>(3.5) * | 113.1<br>(5.0) * | 11980<br>ns |
|                   |                        | Rz                     | 4 | 10741<br>(374) | 2.00<br>(0.13)    | 55.0<br>(3.3)  | 28.5<br>(1.2) | 4.23<br>(0.38) | 127.6<br>(6.3)   | 115.7<br>(4.6)   | 11917       |
| SR                | SR                     | Bk                     | 4 | 10492<br>(419) | 1.87<br>(0.13) ns | 52.9<br>(1.9)  | 38.6<br>(0.9) | 3.46<br>(0.38) | 115.8<br>(4.7) * | 115.8<br>(2.6) * | 12049<br>ns |
|                   |                        | Rz                     | 4 | 18868<br>(336) | 1.60<br>(0.13)    | 53.6<br>(1.7)  | 29.3<br>(0.7) | 4.42<br>(0.58) | 124.9<br>(3.1)   | 119.0<br>(1.9)   | 11962       |
|                   |                        | <b>dlm<sup>b</sup></b> |   | 7.41           | 0.53              | 0.02           | 0.14          | 0.38           | 3.1              | 0.05             | 1.53        |

<sup>a</sup> Initial = initial soil; Sterilized = 100% sterilized soil; IN = intact non sterilized soil; SR = sterilized-reinoculated soil

<sup>b</sup> dlm = detection limit of the method
